# Supplementary material for: Comparative Transcriptome Analysis Reveals Hormone Signaling Genes Involved in the Launch of Culm-Shape Differentiation in Dendrocalamus sinicus
Source: Genes (Basel). 2017 Dec 22;9(1):4. doi: 10.3390/genes9010004 (PMC5793157; doi:10.3390/genes9010004)
Supplement: Supplementary file 1 [file genes-09-00004-s001.xlsx]

## Sheet: BC5vsSC5
#Term	KO ID	Input number	Background number	P-Value	Corrected P-Value	Input
Glycolysis / Gluconeogenesis	ko00010	29	457	0.14151	0.509438	Cluster-995.21158|Cluster-995.23544|Cluster-995.66585|Cluster-995.69868|Cluster-995.74635|Cluster-995.74634|Cluster-995.71385|Cluster-995.67602|Cluster-995.68262|Cluster-995.92330|Cluster-995.68451|Cluster-995.84728|Cluster-995.67921|Cluster-995.62753|Cluster-995.89037|Cluster-995.88563|Cluster-995.65092|Cluster-995.70719|Cluster-995.66945|Cluster-995.66743|Cluster-995.70330|Cluster-995.60334|Clu…
Citrate cycle (TCA cycle)	ko00020	5	176	0.940809	0.999999	Cluster-995.78824|Cluster-995.75016|Cluster-995.21158|Cluster-995.73797|Cluster-995.66259
Pentose phosphate pathway	ko00030	11	215	0.533	0.999999	Cluster-995.67921|Cluster-995.62753|Cluster-995.68262|Cluster-995.65092|Cluster-995.23544|Cluster-995.74635|Cluster-995.74634|Cluster-995.65090|Cluster-995.72254|Cluster-995.66743|Cluster-995.76622
Pentose and glucuronate interconversions	ko00040	9	140	0.293552	0.773258	Cluster-995.81753|Cluster-995.90569|Cluster-995.54525|Cluster-995.92330|Cluster-995.55535|Cluster-995.63618|Cluster-995.66691|Cluster-995.86797|Cluster-995.39617
Fructose and mannose metabolism	ko00051	11	203	0.459845	0.999999	Cluster-995.67921|Cluster-995.62753|Cluster-995.68262|Cluster-995.65092|Cluster-995.89037|Cluster-995.65090|Cluster-995.23544|Cluster-995.74635|Cluster-995.74634|Cluster-995.63618|Cluster-995.62274
Galactose metabolism	ko00052	12	184	0.239392	0.687702	Cluster-995.70744|Cluster-995.86285|Cluster-995.74634|Cluster-995.23544|Cluster-995.43283|Cluster-995.41670|Cluster-995.74635|Cluster-995.65092|Cluster-995.65090|Cluster-995.48487|Cluster-995.65151|Cluster-995.52252
Ascorbate and aldarate metabolism	ko00053	7	132	0.509641	0.999999	Cluster-995.64068|Cluster-995.64080|Cluster-995.54525|Cluster-995.92330|Cluster-995.74275|Cluster-995.88813|Cluster-995.49799
Fatty acid biosynthesis	ko00061	4	112	0.817194	0.999999	Cluster-995.65398|Cluster-995.93132|Cluster-995.82955|Cluster-995.82954
Fatty acid elongation	ko00062	2	63	0.828195	0.999999	Cluster-995.70040|Cluster-995.93051
Fatty acid degradation	ko00071	11	127	0.0707602	0.305684	Cluster-995.61000|Cluster-995.81463|Cluster-995.70330|Cluster-995.66352|Cluster-995.54525|Cluster-995.92330|Cluster-995.60334|Cluster-995.59043|Cluster-995.98908|Cluster-995.95583|Cluster-995.62483
Synthesis and degradation of ketone bodies	ko00072	1	12	0.474602	0.999999	Cluster-995.61000
Cutin, suberine and wax biosynthesis	ko00073	2	55	0.768665	0.999999	Cluster-995.90004|Cluster-995.89118
Steroid biosynthesis	ko00100	7	66	0.0621227	0.279552	Cluster-995.70852|Cluster-995.73076|Cluster-995.73884|Cluster-995.67971|Cluster-995.57249|Cluster-995.75054|Cluster-995.68429
Ubiquinone and other terpenoid-quinone biosynthesis	ko00130	9	114	0.140777	0.509438	Cluster-995.15582|Cluster-995.70779|Cluster-995.38605|Cluster-995.73053|Cluster-995.57206|Cluster-995.84716|Cluster-995.68327|Cluster-995.51932|Cluster-995.57340
Oxidative phosphorylation	ko00190	12	430	0.991101	0.999999	Cluster-995.87676|Cluster-995.67191|Cluster-995.62414|Cluster-995.8410|Cluster-995.66427|Cluster-995.66814|Cluster-995.43120|Cluster-995.70421|Cluster-995.68674|Cluster-995.67069|Cluster-995.64009|Cluster-995.69518
Photosynthesis	ko00195	2	144	0.993996	0.999999	Cluster-995.109800|Cluster-995.84749
Photosynthesis - antenna proteins	ko00196	3	54	0.523869	0.999999	Cluster-995.117482|Cluster-995.117480|Cluster-995.98384
Arginine biosynthesis	ko00220	14	110	0.00266633	0.0359955	Cluster-995.74008|Cluster-995.26525|Cluster-995.75124|Cluster-995.52275|Cluster-995.67501|Cluster-995.107577|Cluster-995.21275|Cluster-995.67930|Cluster-995.76086|Cluster-995.75123|Cluster-995.76213|Cluster-995.105126|Cluster-995.89831|Cluster-995.84504
Purine metabolism	ko00230	26	556	0.687684	0.999999	Cluster-995.99386|Cluster-995.74560|Cluster-995.69868|Cluster-995.68804|Cluster-995.54661|Cluster-995.41410|Cluster-995.91657|Cluster-995.105119|Cluster-995.88563|Cluster-995.63269|Cluster-995.24127|Cluster-995.100691|Cluster-995.85098|Cluster-995.66945|Cluster-995.75435|Cluster-995.96741|Cluster-995.73752|Cluster-995.112239|Cluster-995.103243|Cluster-995.72910|Cluster-995.68766|Cluster-995.42374…
Pyrimidine metabolism	ko00240	15	408	0.917992	0.999999	Cluster-995.24127|Cluster-995.76146|Cluster-995.41410|Cluster-995.105119|Cluster-995.68804|Cluster-995.18900|Cluster-995.55566|Cluster-995.42374|Cluster-995.68831|Cluster-995.105245|Cluster-995.82233|Cluster-995.75435|Cluster-995.96741|Cluster-995.42424|Cluster-995.64095
Alanine, aspartate and glutamate metabolism	ko00250	20	171	0.000968585	0.0149439	Cluster-995.41561|Cluster-995.67930|Cluster-995.26525|Cluster-995.75124|Cluster-995.52275|Cluster-995.67501|Cluster-995.107577|Cluster-995.21275|Cluster-995.44982|Cluster-995.76086|Cluster-995.75123|Cluster-995.76213|Cluster-995.105126|Cluster-995.44979|Cluster-995.44978|Cluster-995.55566|Cluster-995.18900|Cluster-995.91319|Cluster-995.84504|Cluster-995.76079
Glycine, serine and threonine metabolism	ko00260	12	224	0.469302	0.999999	Cluster-995.69697|Cluster-995.88891|Cluster-995.72505|Cluster-995.73606|Cluster-995.76733|Cluster-995.67083|Cluster-995.62039|Cluster-995.65872|Cluster-995.70117|Cluster-995.74785|Cluster-995.68903|Cluster-995.98680
Monobactam biosynthesis	ko00261	2	38	0.581838	0.999999	Cluster-995.66632|Cluster-995.68903
Cysteine and methionine metabolism	ko00270	23	310	0.054755	0.270009	Cluster-995.38271|Cluster-995.24980|Cluster-995.53437|Cluster-995.56766|Cluster-995.80182|Cluster-995.68903|Cluster-995.19751|Cluster-995.75123|Cluster-995.75124|Cluster-995.106777|Cluster-995.68009|Cluster-995.55790|Cluster-995.73797|Cluster-995.76086|Cluster-995.24977|Cluster-995.84504|Cluster-995.67120|Cluster-995.48892|Cluster-995.67538|Cluster-995.106837|Cluster-995.67387|Cluster-995.75016|C…
Valine, leucine and isoleucine degradation	ko00280	8	135	0.386727	0.949239	Cluster-995.61000|Cluster-995.63246|Cluster-995.81463|Cluster-995.54525|Cluster-995.92330|Cluster-995.86664|Cluster-995.59043|Cluster-995.113722
Valine, leucine and isoleucine biosynthesis	ko00290	1	46	0.902578	0.999999	Cluster-995.66220
Lysine biosynthesis	ko00300	2	38	0.581838	0.999999	Cluster-995.66632|Cluster-995.68903
Lysine degradation	ko00310	6	133	0.667639	0.999999	Cluster-995.61000|Cluster-995.54252|Cluster-995.22135|Cluster-995.78274|Cluster-995.54525|Cluster-995.92330
Arginine and proline metabolism	ko00330	18	168	0.00400365	0.0465166	Cluster-995.54422|Cluster-995.68009|Cluster-995.71473|Cluster-995.19751|Cluster-995.82183|Cluster-995.54525|Cluster-995.24921|Cluster-995.92330|Cluster-995.75123|Cluster-995.59897|Cluster-995.76086|Cluster-995.75124|Cluster-995.77044|Cluster-995.65260|Cluster-995.53437|Cluster-995.84504|Cluster-995.25554|Cluster-995.14029
Histidine metabolism	ko00340	4	55	0.31804	0.817817	Cluster-995.92330|Cluster-995.61651|Cluster-995.54525|Cluster-995.61519
Tyrosine metabolism	ko00350	12	93	0.00472327	0.0465166	Cluster-995.70330|Cluster-995.72505|Cluster-995.60334|Cluster-995.76733|Cluster-995.66352|Cluster-995.76086|Cluster-995.62039|Cluster-995.75124|Cluster-995.61519|Cluster-995.75123|Cluster-995.84504|Cluster-995.62483
Phenylalanine metabolism	ko00360	19	127	8.01266e-05	0.00216342	Cluster-995.66764|Cluster-995.72505|Cluster-995.75123|Cluster-995.76733|Cluster-995.73053|Cluster-995.57206|Cluster-995.76086|Cluster-995.66569|Cluster-995.62039|Cluster-995.84716|Cluster-995.75124|Cluster-995.61519|Cluster-995.66005|Cluster-995.75102|Cluster-995.67588|Cluster-995.84504|Cluster-995.51932|Cluster-995.57340|Cluster-995.71288
Tryptophan metabolism	ko00380	7	93	0.208698	0.662924	Cluster-995.61000|Cluster-995.64140|Cluster-995.54525|Cluster-995.92330|Cluster-995.66283|Cluster-995.69575|Cluster-995.61761
Phenylalanine, tyrosine and tryptophan biosynthesis	ko00400	14	139	0.0163569	0.132867	Cluster-995.88891|Cluster-995.74455|Cluster-995.94676|Cluster-995.85199|Cluster-995.68213|Cluster-995.76086|Cluster-995.75123|Cluster-995.71042|Cluster-995.67587|Cluster-995.75124|Cluster-995.61519|Cluster-995.85200|Cluster-995.84504|Cluster-995.66938
beta-Alanine metabolism	ko00410	9	131	0.235815	0.687702	Cluster-995.54422|Cluster-995.76733|Cluster-995.19751|Cluster-995.82183|Cluster-995.54525|Cluster-995.92330|Cluster-995.62039|Cluster-995.77044|Cluster-995.72505
Taurine and hypotaurine metabolism	ko00430	6	52	0.0601771	0.279552	Cluster-995.53783|Cluster-995.92764|Cluster-995.71033|Cluster-995.60174|Cluster-995.105113|Cluster-995.62502
Selenocompound metabolism	ko00450	2	57	0.785042	0.999999	Cluster-995.106837|Cluster-995.69985
Cyanoamino acid metabolism	ko00460	10	136	0.168921	0.552832	Cluster-995.65872|Cluster-995.65627|Cluster-995.60683|Cluster-995.68475|Cluster-995.19887|Cluster-995.63324|Cluster-995.70117|Cluster-995.74785|Cluster-995.51581|Cluster-995.82673
Glutathione metabolism	ko00480	17	250	0.150144	0.523083	Cluster-995.67204|Cluster-995.55823|Cluster-995.55822|Cluster-995.55790|Cluster-995.67503|Cluster-995.42374|Cluster-995.19751|Cluster-995.62741|Cluster-995.68335|Cluster-995.35340|Cluster-995.68804|Cluster-995.105119|Cluster-995.66150|Cluster-995.88813|Cluster-995.37192|Cluster-995.76622|Cluster-995.69920
Starch and sucrose metabolism	ko00500	31	536	0.262148	0.725949	Cluster-995.63102|Cluster-995.58709|Cluster-995.65627|Cluster-995.41670|Cluster-995.70822|Cluster-995.19887|Cluster-995.51581|Cluster-995.90569|Cluster-995.86954|Cluster-995.102610|Cluster-995.68475|Cluster-995.63324|Cluster-995.50404|Cluster-995.82673|Cluster-995.68116|Cluster-995.49634|Cluster-995.69359|Cluster-995.75475|Cluster-995.65151|Cluster-995.86797|Cluster-995.52252|Cluster-995.67310|Cl…
N-Glycan biosynthesis	ko00510	1	149	0.999419	0.999999	Cluster-995.70187
Other glycan degradation	ko00511	1	67	0.965639	0.999999	Cluster-995.82274
Amino sugar and nucleotide sugar metabolism	ko00520	13	360	0.915956	0.999999	Cluster-995.2151|Cluster-995.74081|Cluster-995.23002|Cluster-995.69951|Cluster-995.70078|Cluster-995.74082|Cluster-995.52798|Cluster-995.52799|Cluster-995.75475|Cluster-995.62274|Cluster-995.3218|Cluster-995.67310|Cluster-995.70399
Glycosaminoglycan degradation	ko00531	3	56	0.547359	0.999999	Cluster-995.73995|Cluster-995.73994|Cluster-995.44789
Glycerolipid metabolism	ko00561	8	200	0.791681	0.999999	Cluster-995.71113|Cluster-995.70744|Cluster-995.53698|Cluster-995.62769|Cluster-995.54525|Cluster-995.92330|Cluster-995.82108|Cluster-995.98680
Inositol phosphate metabolism	ko00562	7	195	0.861171	0.999999	Cluster-995.89037|Cluster-995.60503|Cluster-995.60504|Cluster-995.63728|Cluster-995.68650|Cluster-995.68829|Cluster-995.55192
Glycosylphosphatidylinositol(GPI)-anchor biosynthesis	ko00563	2	109	0.97299	0.999999	Cluster-995.66011|Cluster-995.85496
Glycerophospholipid metabolism	ko00564	15	331	0.702676	0.999999	Cluster-995.64740|Cluster-995.62769|Cluster-995.45538|Cluster-995.65530|Cluster-995.60503|Cluster-995.65886|Cluster-995.64739|Cluster-995.52480|Cluster-995.82108|Cluster-995.69009|Cluster-995.60504|Cluster-995.68829|Cluster-995.75436|Cluster-995.63988|Cluster-995.47499
Ether lipid metabolism	ko00565	9	109	0.117326	0.469305	Cluster-995.64740|Cluster-995.45538|Cluster-995.60503|Cluster-995.64739|Cluster-995.52480|Cluster-995.60504|Cluster-995.69009|Cluster-995.68829|Cluster-995.47499
Arachidonic acid metabolism	ko00590	3	40	0.344472	0.865186	Cluster-995.64740|Cluster-995.62741|Cluster-995.64739
Linoleic acid metabolism	ko00591	5	38	0.0550018	0.270009	Cluster-995.64740|Cluster-995.66924|Cluster-995.64739|Cluster-995.120781|Cluster-995.88511
alpha-Linolenic acid metabolism	ko00592	18	114	6.62352e-05	0.00216342	Cluster-995.64740|Cluster-995.70330|Cluster-995.63496|Cluster-995.62852|Cluster-995.66352|Cluster-995.64739|Cluster-995.59043|Cluster-995.60334|Cluster-995.81463|Cluster-995.53225|Cluster-995.69415|Cluster-995.60994|Cluster-995.98908|Cluster-995.88511|Cluster-995.66643|Cluster-995.95583|Cluster-995.62483|Cluster-995.77897
Sphingolipid metabolism	ko00600	2	122	0.98444	0.999999	Cluster-995.70744|Cluster-995.82274
Glycosphingolipid biosynthesis - globo series	ko00603	1	23	0.695319	0.999999	Cluster-995.70744
Pyruvate metabolism	ko00620	23	283	0.0243922	0.175624	Cluster-995.21158|Cluster-995.69868|Cluster-995.77130|Cluster-995.2859|Cluster-995.72329|Cluster-995.61000|Cluster-995.69909|Cluster-995.69729|Cluster-995.92330|Cluster-995.84728|Cluster-995.73230|Cluster-995.88563|Cluster-995.73797|Cluster-995.65183|Cluster-995.69732|Cluster-995.69731|Cluster-995.93132|Cluster-995.54525|Cluster-995.68646|Cluster-995.75016|Cluster-995.66259|Cluster-995.65398|Clus…
Glyoxylate and dicarboxylate metabolism	ko00630	22	195	0.000856108	0.0149439	Cluster-995.67930|Cluster-995.26525|Cluster-995.76213|Cluster-995.2859|Cluster-995.78824|Cluster-995.67083|Cluster-995.61000|Cluster-995.65872|Cluster-995.67501|Cluster-995.8745|Cluster-995.75016|Cluster-995.69575|Cluster-995.21275|Cluster-995.81428|Cluster-995.59268|Cluster-995.66283|Cluster-995.98680|Cluster-995.61761|Cluster-995.66259|Cluster-995.70117|Cluster-995.74785|Cluster-995.73797
Propanoate metabolism	ko00640	6	87	0.293091	0.773258	Cluster-995.61000|Cluster-995.93132|Cluster-995.65398|Cluster-995.86664|Cluster-995.84728|Cluster-995.113722
Butanoate metabolism	ko00650	5	55	0.163032	0.550232	Cluster-995.61000|Cluster-995.76079|Cluster-995.44982|Cluster-995.44979|Cluster-995.44978
One carbon pool by folate	ko00670	3	92	0.843404	0.999999	Cluster-995.74785|Cluster-995.65872|Cluster-995.70117
Carbon fixation in photosynthetic organisms	ko00710	25	270	0.0047378	0.0465166	Cluster-995.107577|Cluster-995.66585|Cluster-995.65183|Cluster-995.77130|Cluster-995.72329|Cluster-995.71385|Cluster-995.73230|Cluster-995.68262|Cluster-995.69729|Cluster-995.75123|Cluster-995.105126|Cluster-995.75124|Cluster-995.67921|Cluster-995.89037|Cluster-995.70719|Cluster-995.73797|Cluster-995.76086|Cluster-995.84504|Cluster-995.8745|Cluster-995.69732|Cluster-995.69731|Cluster-995.66338|Cl…
Thiamine metabolism	ko00730	4	48	0.241969	0.687702	Cluster-995.71820|Cluster-995.59142|Cluster-995.105365|Cluster-995.29223
Vitamin B6 metabolism	ko00750	2	43	0.646265	0.999999	Cluster-995.73606|Cluster-995.74974
Nicotinate and nicotinamide metabolism	ko00760	2	64	0.834578	0.999999	Cluster-995.76146|Cluster-995.82747
Pantothenate and CoA biosynthesis	ko00770	1	96	0.991866	0.999999	Cluster-995.66220
Porphyrin and chlorophyll metabolism	ko00860	3	175	0.992615	0.999999	Cluster-995.93166|Cluster-995.45452|Cluster-995.104485
Terpenoid backbone biosynthesis	ko00900	4	161	0.96069	0.999999	Cluster-995.61000|Cluster-995.71820|Cluster-995.59142|Cluster-995.29223
Limonene and pinene degradation	ko00903	6	46	0.0384463	0.218537	Cluster-995.84704|Cluster-995.92330|Cluster-995.54525|Cluster-995.86672|Cluster-995.114706|Cluster-995.86453
Diterpenoid biosynthesis	ko00904	4	48	0.241969	0.687702	Cluster-995.3300|Cluster-995.12121|Cluster-995.56964|Cluster-2836.0
Brassinosteroid biosynthesis	ko00905	5	45	0.0924385	0.383975	Cluster-995.74301|Cluster-995.32504|Cluster-995.74302|Cluster-995.64483|Cluster-995.38124
Carotenoid biosynthesis	ko00906	7	128	0.478716	0.999999	Cluster-995.47626|Cluster-995.39228|Cluster-995.56689|Cluster-995.38843|Cluster-995.69683|Cluster-995.86158|Cluster-995.109360
Zeatin biosynthesis	ko00908	1	56	0.940681	0.999999	Cluster-14246.0
Sesquiterpenoid and triterpenoid biosynthesis	ko00909	3	24	0.139571	0.509438	Cluster-995.75054|Cluster-995.70852|Cluster-995.67971
Nitrogen metabolism	ko00910	9	84	0.0355772	0.213463	Cluster-995.67930|Cluster-995.26525|Cluster-995.81428|Cluster-995.67501|Cluster-995.21275|Cluster-995.58298|Cluster-995.76213|Cluster-995.67622|Cluster-995.52275
Sulfur metabolism	ko00920	5	107	0.634171	0.999999	Cluster-995.69578|Cluster-995.63927|Cluster-995.77040|Cluster-995.38271|Cluster-995.76104
Phenylpropanoid biosynthesis	ko00940	39	394	0.000147022	0.00317567	Cluster-995.71840|Cluster-995.87440|Cluster-995.84439|Cluster-995.115702|Cluster-995.19887|Cluster-995.64799|Cluster-995.51581|Cluster-995.51932|Cluster-995.66915|Cluster-995.71288|Cluster-995.66764|Cluster-995.68857|Cluster-995.67494|Cluster-995.68475|Cluster-995.27520|Cluster-995.63324|Cluster-995.75102|Cluster-995.82673|Cluster-995.66962|Cluster-995.73053|Cluster-995.60367|Cluster-995.68818|Cl…
Flavonoid biosynthesis	ko00941	9	73	0.0172235	0.132867	Cluster-995.73053|Cluster-995.72404|Cluster-995.57206|Cluster-995.84716|Cluster-995.61203|Cluster-995.73857|Cluster-995.67588|Cluster-995.51932|Cluster-995.57340
Stilbenoid, diarylheptanoid and gingerol biosynthesis	ko00945	12	54	6.64632e-05	0.00216342	Cluster-995.73053|Cluster-995.57206|Cluster-995.84704|Cluster-995.114706|Cluster-995.61203|Cluster-995.84716|Cluster-995.73857|Cluster-995.86672|Cluster-995.67588|Cluster-995.51932|Cluster-995.57340|Cluster-995.86453
Isoquinoline alkaloid biosynthesis	ko00950	7	47	0.0146788	0.132109	Cluster-995.72505|Cluster-995.75123|Cluster-995.76733|Cluster-995.76086|Cluster-995.62039|Cluster-995.75124|Cluster-995.84504
Tropane, piperidine and pyridine alkaloid biosynthesis	ko00960	8	67	0.0279297	0.188525	Cluster-995.72505|Cluster-995.75123|Cluster-995.76733|Cluster-995.76086|Cluster-995.62039|Cluster-995.75124|Cluster-995.61519|Cluster-995.84504
Aminoacyl-tRNA biosynthesis	ko00970	4	214	0.994086	0.999999	Cluster-995.50539|Cluster-995.69176|Cluster-995.69985|Cluster-995.72680
Biosynthesis of unsaturated fatty acids	ko01040	9	91	0.0525166	0.270009	Cluster-995.81463|Cluster-995.67062|Cluster-995.59043|Cluster-995.82954|Cluster-995.93051|Cluster-995.82955|Cluster-995.98908|Cluster-995.95583|Cluster-995.67220
ABC transporters	ko02010	4	137	0.913773	0.999999	Cluster-995.98570|Cluster-995.55938|Cluster-995.98573|Cluster-995.65573
Ribosome biogenesis in eukaryotes	ko03008	13	315	0.804496	0.999999	Cluster-995.43048|Cluster-995.51071|Cluster-995.47341|Cluster-995.67107|Cluster-995.71019|Cluster-995.82897|Cluster-995.69508|Cluster-995.47188|Cluster-995.75488|Cluster-995.83252|Cluster-995.79036|Cluster-995.46390|Cluster-995.37709
Ribosome	ko03010	27	860	0.997191	0.999999	Cluster-995.49586|Cluster-995.63517|Cluster-995.65086|Cluster-995.71697|Cluster-995.72071|Cluster-995.67224|Cluster-995.64505|Cluster-995.67636|Cluster-995.61272|Cluster-995.68490|Cluster-995.69645|Cluster-995.64105|Cluster-995.67808|Cluster-995.85920|Cluster-995.75158|Cluster-995.66158|Cluster-995.71054|Cluster-995.58970|Cluster-995.66673|Cluster-995.66723|Cluster-995.69153|Cluster-995.69072|Clu…
RNA transport	ko03013	7	536	0.999999	0.999999	Cluster-995.64072|Cluster-995.74101|Cluster-995.68052|Cluster-995.71519|Cluster-995.53349|Cluster-995.55713|Cluster-995.37709
mRNA surveillance pathway	ko03015	8	396	0.99919	0.999999	Cluster-995.63925|Cluster-995.74101|Cluster-995.43415|Cluster-995.76294|Cluster-995.72537|Cluster-995.54865|Cluster-995.84727|Cluster-995.53349
RNA degradation	ko03018	19	488	0.898846	0.999999	Cluster-995.62154|Cluster-995.74635|Cluster-995.67602|Cluster-995.51071|Cluster-995.74634|Cluster-995.67350|Cluster-995.57996|Cluster-995.65090|Cluster-995.23544|Cluster-995.77015|Cluster-995.65092|Cluster-995.62945|Cluster-995.60898|Cluster-995.47188|Cluster-995.69082|Cluster-995.46084|Cluster-995.64669|Cluster-995.82897|Cluster-995.83920
RNA polymerase	ko03020	2	108	0.971831	0.999999	Cluster-995.96741|Cluster-995.42424
Basal transcription factors	ko03022	4	149	0.94138	0.999999	Cluster-995.72811|Cluster-995.112736|Cluster-995.107883|Cluster-995.18702
DNA replication	ko03030	17	198	0.0319547	0.203006	Cluster-995.24127|Cluster-995.26135|Cluster-995.105224|Cluster-995.46107|Cluster-995.110863|Cluster-995.105975|Cluster-995.89006|Cluster-995.26521|Cluster-995.24314|Cluster-995.83139|Cluster-995.95112|Cluster-995.49556|Cluster-995.105939|Cluster-995.41410|Cluster-995.88998|Cluster-995.108684|Cluster-995.105981
Spliceosome	ko03040	22	608	0.959137	0.999999	Cluster-995.74117|Cluster-995.60898|Cluster-995.71695|Cluster-995.66914|Cluster-995.90300|Cluster-995.71097|Cluster-995.74101|Cluster-995.93660|Cluster-995.64686|Cluster-995.66284|Cluster-995.78543|Cluster-995.79512|Cluster-995.95850|Cluster-995.66381|Cluster-995.64178|Cluster-995.50772|Cluster-995.67652|Cluster-995.72010|Cluster-995.81064|Cluster-995.39630|Cluster-995.97800|Cluster-995.68988
Proteasome	ko03050	3	178	0.993448	0.999999	Cluster-995.62355|Cluster-995.56163|Cluster-995.58383
Protein export	ko03060	1	175	0.999841	0.999999	Cluster-995.119300
Base excision repair	ko03410	4	164	0.964497	0.999999	Cluster-995.22079|Cluster-995.95112|Cluster-995.26135|Cluster-995.26521
Nucleotide excision repair	ko03420	11	276	0.823071	0.999999	Cluster-995.26135|Cluster-995.99068|Cluster-995.26521|Cluster-995.110863|Cluster-995.83139|Cluster-995.112736|Cluster-995.95112|Cluster-995.18702|Cluster-995.56651|Cluster-995.105939|Cluster-995.107883
Mismatch repair	ko03430	6	164	0.834887	0.999999	Cluster-995.26135|Cluster-995.26521|Cluster-995.110863|Cluster-995.83139|Cluster-995.95112|Cluster-995.105939
Homologous recombination	ko03440	5	237	0.991974	0.999999	Cluster-995.83139|Cluster-995.110863|Cluster-995.89418|Cluster-995.57317|Cluster-995.105939
Plant hormone signal transduction	ko04075	60	668	3.95539e-05	0.00216342	Cluster-995.20577|Cluster-995.68010|Cluster-995.78858|Cluster-995.65690|Cluster-995.49359|Cluster-995.62731|Cluster-995.73049|Cluster-995.92483|Cluster-995.66815|Cluster-995.63644|Cluster-995.67348|Cluster-995.72152|Cluster-995.67304|Cluster-995.98388|Cluster-995.61242|Cluster-995.90150|Cluster-995.95114|Cluster-995.31673|Cluster-995.59832|Cluster-995.108954|Cluster-995.69660|Cluster-995.62338|Cl…
Cell cycle - Caulobacter	ko04112	3	80	0.770832	0.999999	Cluster-995.71636|Cluster-995.80845|Cluster-995.59063
Ubiquitin mediated proteolysis	ko04120	20	479	0.834043	0.999999	Cluster-995.68285|Cluster-995.97049|Cluster-995.91352|Cluster-995.17731|Cluster-995.97048|Cluster-995.105427|Cluster-995.67418|Cluster-995.71783|Cluster-995.32922|Cluster-995.85964|Cluster-995.59628|Cluster-995.106071|Cluster-995.59933|Cluster-995.71519|Cluster-995.79668|Cluster-995.109020|Cluster-995.107323|Cluster-995.62279|Cluster-995.58358|Cluster-995.45949
SNARE interactions in vesicular transport	ko04130	5	135	0.811744	0.999999	Cluster-995.66653|Cluster-995.76705|Cluster-995.25850|Cluster-995.91264|Cluster-995.63366
Regulation of autophagy	ko04140	4	152	0.946888	0.999999	Cluster-995.76183|Cluster-995.70047|Cluster-995.59360|Cluster-995.65757
Protein processing in endoplasmic reticulum	ko04141	22	620	0.967371	0.999999	Cluster-995.68285|Cluster-995.68382|Cluster-995.64793|Cluster-995.75932|Cluster-995.71511|Cluster-995.71510|Cluster-995.64629|Cluster-995.79952|Cluster-995.102751|Cluster-995.66914|Cluster-995.68145|Cluster-995.71155|Cluster-995.67418|Cluster-995.72213|Cluster-995.66381|Cluster-995.71637|Cluster-995.64178|Cluster-995.67652|Cluster-995.65906|Cluster-995.90451|Cluster-995.57739|Cluster-995.57738
Endocytosis	ko04144	15	518	0.993039	0.999999	Cluster-995.66914|Cluster-995.45538|Cluster-995.64178|Cluster-995.111918|Cluster-995.82028|Cluster-995.67652|Cluster-995.52480|Cluster-995.69009|Cluster-995.109787|Cluster-995.72717|Cluster-995.92374|Cluster-995.47499|Cluster-995.99497|Cluster-995.64114|Cluster-995.66381
Phagosome	ko04145	10	294	0.925563	0.999999	Cluster-995.64213|Cluster-995.66653|Cluster-995.87676|Cluster-995.67776|Cluster-995.68382|Cluster-995.43120|Cluster-995.66947|Cluster-995.24536|Cluster-995.26443|Cluster-995.72213
Peroxisome	ko04146	10	245	0.792077	0.999999	Cluster-995.64456|Cluster-995.81463|Cluster-995.61761|Cluster-995.59268|Cluster-995.59043|Cluster-995.66283|Cluster-995.69575|Cluster-995.98908|Cluster-995.90004|Cluster-995.95583
Plant-pathogen interaction	ko04626	27	619	0.807515	0.999999	Cluster-995.111488|Cluster-995.52917|Cluster-995.81433|Cluster-995.69610|Cluster-995.49477|Cluster-995.53200|Cluster-995.64629|Cluster-995.65976|Cluster-995.61990|Cluster-995.51794|Cluster-995.66701|Cluster-995.65328|Cluster-995.69354|Cluster-995.76011|Cluster-995.73726|Cluster-995.52155|Cluster-995.65231|Cluster-995.28646|Cluster-995.38355|Cluster-995.66606|Cluster-995.79271|Cluster-995.83441|Cl…
Circadian rhythm - plant	ko04712	4	131	0.896016	0.999999	Cluster-995.23473|Cluster-995.92735|Cluster-995.87246|Cluster-995.53524

## Sheet: BC15vsSC15
#Term	KO ID	Input number	Background number	P-Value	Corrected P-Value	Input
Glycolysis / Gluconeogenesis	ko00010	40	457	0.0017559	0.0375763	Cluster-995.69863|Cluster-995.67978|Cluster-995.86014|Cluster-995.66720|Cluster-995.74634|Cluster-995.38884|Cluster-995.65874|Cluster-995.85790|Cluster-995.52470|Cluster-995.66743|Cluster-995.92330|Cluster-995.68451|Cluster-995.66338|Cluster-995.84728|Cluster-995.68168|Cluster-995.67921|Cluster-995.62753|Cluster-995.72549|Cluster-995.90806|Cluster-995.60246|Cluster-995.65092|Cluster-995.70719|Clu…
Citrate cycle (TCA cycle)	ko00020	21	176	0.000777548	0.0207994	Cluster-995.35438|Cluster-995.70689|Cluster-995.68225|Cluster-995.81185|Cluster-995.86014|Cluster-995.76123|Cluster-995.82687|Cluster-995.52470|Cluster-995.67313|Cluster-995.79750|Cluster-995.77471|Cluster-995.73797|Cluster-995.70586|Cluster-995.72378|Cluster-995.69395|Cluster-995.75016|Cluster-995.66261|Cluster-995.74334|Cluster-995.85790|Cluster-995.78592|Cluster-995.81186
Pentose phosphate pathway	ko00030	18	215	0.0410715	0.244659	Cluster-995.67921|Cluster-995.64869|Cluster-995.62753|Cluster-995.69863|Cluster-995.65092|Cluster-995.66720|Cluster-995.72006|Cluster-995.70888|Cluster-995.71965|Cluster-995.64569|Cluster-995.76622|Cluster-995.81493|Cluster-995.72254|Cluster-995.81389|Cluster-995.74634|Cluster-995.66743|Cluster-995.60548|Cluster-995.60756
Pentose and glucuronate interconversions	ko00040	12	140	0.0739702	0.344122	Cluster-995.81753|Cluster-995.70930|Cluster-995.64673|Cluster-995.48190|Cluster-995.71965|Cluster-995.92330|Cluster-995.66691|Cluster-995.68023|Cluster-995.73505|Cluster-995.86797|Cluster-995.70036|Cluster-995.39617
Fructose and mannose metabolism	ko00051	10	203	0.611156	0.999995	Cluster-995.67921|Cluster-995.64869|Cluster-995.62753|Cluster-995.74634|Cluster-995.66720|Cluster-995.70646|Cluster-995.68728|Cluster-995.65092|Cluster-995.81389|Cluster-995.60548
Galactose metabolism	ko00052	12	184	0.263564	0.775419	Cluster-995.86282|Cluster-995.69863|Cluster-995.74634|Cluster-995.68168|Cluster-995.72892|Cluster-995.70036|Cluster-995.65092|Cluster-995.71930|Cluster-995.73505|Cluster-995.77300|Cluster-995.52252|Cluster-995.45481
Ascorbate and aldarate metabolism	ko00053	9	132	0.262678	0.775419	Cluster-995.83017|Cluster-995.70930|Cluster-995.64673|Cluster-995.61417|Cluster-995.92330|Cluster-995.47313|Cluster-995.67293|Cluster-995.88813|Cluster-995.68023
Fatty acid biosynthesis	ko00061	5	112	0.69173	0.999995	Cluster-995.82717|Cluster-995.77950|Cluster-995.82175|Cluster-995.14415|Cluster-995.14416
Fatty acid elongation	ko00062	2	63	0.837905	0.999995	Cluster-995.69131|Cluster-995.70988
Fatty acid degradation	ko00071	11	127	0.0802326	0.357704	Cluster-995.64673|Cluster-995.70330|Cluster-995.67051|Cluster-995.66352|Cluster-995.92330|Cluster-995.82717|Cluster-995.58274|Cluster-995.88228|Cluster-995.98908|Cluster-995.62497|Cluster-995.62483
Synthesis and degradation of ketone bodies	ko00072	3	12	0.0350685	0.234521	Cluster-995.62497|Cluster-995.69118|Cluster-995.73932
Cutin, suberine and wax biosynthesis	ko00073	1	55	0.941652	0.999995	Cluster-995.89118
Steroid biosynthesis	ko00100	13	66	0.000123387	0.00440081	Cluster-995.101349|Cluster-995.57249|Cluster-995.65111|Cluster-995.59458|Cluster-995.62358|Cluster-995.72125|Cluster-995.67971|Cluster-995.69327|Cluster-995.70118|Cluster-995.75054|Cluster-995.77350|Cluster-995.68429|Cluster-995.66425
Ubiquinone and other terpenoid-quinone biosynthesis	ko00130	4	114	0.840637	0.999995	Cluster-995.68327|Cluster-995.59081|Cluster-995.65679|Cluster-995.70779
Oxidative phosphorylation	ko00190	27	430	0.193791	0.653123	Cluster-995.68102|Cluster-995.50394|Cluster-995.53455|Cluster-995.8410|Cluster-995.78949|Cluster-995.82687|Cluster-995.76123|Cluster-995.67498|Cluster-995.81186|Cluster-995.81185|Cluster-995.79618|Cluster-995.68008|Cluster-995.68674|Cluster-995.81619|Cluster-995.66310|Cluster-995.74576|Cluster-995.71973|Cluster-995.49222|Cluster-995.63965|Cluster-995.68751|Cluster-995.66620|Cluster-995.70413|Clus…
Photosynthesis - antenna proteins	ko00196	2	54	0.771365	0.999995	Cluster-995.117480|Cluster-995.117482
Arginine biosynthesis	ko00220	6	110	0.513722	0.999995	Cluster-995.68450|Cluster-995.67930|Cluster-995.69457|Cluster-995.73577|Cluster-995.62571|Cluster-995.75124
Purine metabolism	ko00230	19	556	0.978575	0.999995	Cluster-995.73182|Cluster-995.69485|Cluster-995.64872|Cluster-995.72549|Cluster-995.69863|Cluster-995.62571|Cluster-995.82233|Cluster-995.64177|Cluster-995.55664|Cluster-995.55924|Cluster-995.42374|Cluster-995.49527|Cluster-995.68804|Cluster-995.66272|Cluster-995.107766|Cluster-995.75435|Cluster-995.60246|Cluster-995.67306|Cluster-995.73752
Pyrimidine metabolism	ko00240	13	408	0.976758	0.999995	Cluster-995.73182|Cluster-995.69485|Cluster-995.66432|Cluster-995.80543|Cluster-995.55924|Cluster-995.42374|Cluster-995.49527|Cluster-995.68804|Cluster-995.105245|Cluster-995.107766|Cluster-995.75435|Cluster-995.67306|Cluster-995.82233
Alanine, aspartate and glutamate metabolism	ko00250	10	171	0.404847	0.921672	Cluster-995.68450|Cluster-995.67930|Cluster-995.69457|Cluster-995.76079|Cluster-995.73577|Cluster-995.44982|Cluster-995.45197|Cluster-995.67836|Cluster-995.75124|Cluster-995.91319
Glycine, serine and threonine metabolism	ko00260	19	224	0.0329828	0.234521	Cluster-995.69697|Cluster-995.65872|Cluster-995.72505|Cluster-995.90041|Cluster-995.73606|Cluster-995.60610|Cluster-995.76734|Cluster-995.63091|Cluster-995.62039|Cluster-995.88891|Cluster-995.107641|Cluster-995.60476|Cluster-995.67022|Cluster-995.70117|Cluster-995.74785|Cluster-995.110280|Cluster-995.43568|Cluster-995.67313|Cluster-995.66010
Monobactam biosynthesis	ko00261	1	38	0.861655	0.999995	Cluster-995.60476
Cysteine and methionine metabolism	ko00270	27	310	0.00957848	0.118871	Cluster-995.70689|Cluster-995.24980|Cluster-995.73577|Cluster-995.56766|Cluster-995.70586|Cluster-995.80182|Cluster-995.66666|Cluster-995.74158|Cluster-995.64998|Cluster-995.69454|Cluster-995.61776|Cluster-995.60476|Cluster-995.68009|Cluster-995.69692|Cluster-995.68296|Cluster-995.74531|Cluster-995.59780|Cluster-995.75124|Cluster-995.55790|Cluster-995.21373|Cluster-995.73797|Cluster-995.24977|Clu…
Valine, leucine and isoleucine degradation	ko00280	9	135	0.28259	0.775419	Cluster-995.64673|Cluster-995.73932|Cluster-995.92330|Cluster-995.61456|Cluster-995.75421|Cluster-995.58274|Cluster-995.62497|Cluster-995.69118|Cluster-995.67313
Valine, leucine and isoleucine biosynthesis	ko00290	6	46	0.042246	0.244659	Cluster-995.90041|Cluster-995.65178|Cluster-995.66220|Cluster-995.68220|Cluster-995.83528|Cluster-995.52335
Lysine biosynthesis	ko00300	2	38	0.594588	0.999995	Cluster-995.66267|Cluster-995.60476
Lysine degradation	ko00310	9	133	0.269267	0.775419	Cluster-995.64673|Cluster-995.52803|Cluster-995.54252|Cluster-995.80346|Cluster-995.92330|Cluster-995.79750|Cluster-995.62497|Cluster-995.110280|Cluster-995.74334
Arginine and proline metabolism	ko00330	9	168	0.513345	0.999995	Cluster-995.73577|Cluster-995.64673|Cluster-995.75525|Cluster-995.75124|Cluster-995.92330|Cluster-995.45197|Cluster-995.57926|Cluster-995.68009|Cluster-995.70268
Histidine metabolism	ko00340	2	55	0.779793	0.999995	Cluster-995.92330|Cluster-995.64673
Tyrosine metabolism	ko00350	10	93	0.0310689	0.234521	Cluster-995.70330|Cluster-995.45158|Cluster-995.66352|Cluster-995.76734|Cluster-995.73577|Cluster-995.62039|Cluster-995.88228|Cluster-995.75124|Cluster-995.72505|Cluster-995.62483
Phenylalanine metabolism	ko00360	13	127	0.0214182	0.190979	Cluster-995.66764|Cluster-995.68104|Cluster-995.72505|Cluster-995.45158|Cluster-995.68617|Cluster-995.76734|Cluster-995.66569|Cluster-995.73577|Cluster-995.62039|Cluster-995.65679|Cluster-995.75124|Cluster-995.75102|Cluster-995.67588
Tryptophan metabolism	ko00380	6	93	0.364447	0.861404	Cluster-995.64673|Cluster-995.92330|Cluster-995.36667|Cluster-995.69575|Cluster-995.62497|Cluster-995.79750
Phenylalanine, tyrosine and tryptophan biosynthesis	ko00400	14	139	0.0195336	0.190009	Cluster-995.65042|Cluster-995.88891|Cluster-995.50075|Cluster-995.45158|Cluster-995.68213|Cluster-995.73577|Cluster-995.69228|Cluster-995.76191|Cluster-995.67587|Cluster-995.75124|Cluster-995.85720|Cluster-995.60775|Cluster-995.85200|Cluster-995.66938
beta-Alanine metabolism	ko00410	9	131	0.256141	0.775419	Cluster-995.64673|Cluster-995.72505|Cluster-995.61456|Cluster-995.76734|Cluster-995.92330|Cluster-995.62039|Cluster-995.58274|Cluster-995.67836|Cluster-995.75421
Taurine and hypotaurine metabolism	ko00430	1	52	0.932046	0.999995	Cluster-995.67836
Selenocompound metabolism	ko00450	2	57	0.795833	0.999995	Cluster-995.106837|Cluster-995.80543
Cyanoamino acid metabolism	ko00460	23	136	3.62987e-06	0.000194198	Cluster-995.71166|Cluster-995.86857|Cluster-995.65872|Cluster-995.69170|Cluster-995.68475|Cluster-995.61776|Cluster-995.63324|Cluster-995.74531|Cluster-995.69692|Cluster-995.60683|Cluster-995.60682|Cluster-995.105107|Cluster-995.77122|Cluster-995.58652|Cluster-995.73757|Cluster-995.65040|Cluster-995.68279|Cluster-995.65627|Cluster-995.73081|Cluster-995.63091|Cluster-995.107641|Cluster-995.70117|C…
Glutathione metabolism	ko00480	18	250	0.116336	0.444571	Cluster-995.55820|Cluster-995.59920|Cluster-995.62140|Cluster-995.60756|Cluster-995.55790|Cluster-995.67503|Cluster-995.42374|Cluster-995.66150|Cluster-995.61833|Cluster-995.68335|Cluster-995.65576|Cluster-995.68804|Cluster-995.47313|Cluster-995.67293|Cluster-995.88813|Cluster-995.57783|Cluster-995.76622|Cluster-995.65517
Starch and sucrose metabolism	ko00500	35	536	0.111577	0.442174	Cluster-995.69863|Cluster-995.78252|Cluster-995.69126|Cluster-995.71166|Cluster-995.67952|Cluster-995.64656|Cluster-995.86857|Cluster-995.69170|Cluster-995.70822|Cluster-995.68248|Cluster-995.60804|Cluster-995.68475|Cluster-995.78030|Cluster-995.86797|Cluster-995.91662|Cluster-995.68023|Cluster-995.105775|Cluster-995.70930|Cluster-995.68116|Cluster-995.34397|Cluster-995.114011|Cluster-995.77122|C…
N-Glycan biosynthesis	ko00510	1	149	0.999513	0.999995	Cluster-995.77931
Other glycan degradation	ko00511	3	67	0.678841	0.999995	Cluster-995.69108|Cluster-995.70985|Cluster-995.82271
Amino sugar and nucleotide sugar metabolism	ko00520	25	360	0.100227	0.412473	Cluster-995.60378|Cluster-995.69863|Cluster-995.63763|Cluster-995.69126|Cluster-995.67952|Cluster-995.69108|Cluster-995.64656|Cluster-995.77300|Cluster-995.60804|Cluster-995.78030|Cluster-995.68023|Cluster-995.105775|Cluster-995.76819|Cluster-995.70930|Cluster-995.69951|Cluster-995.114011|Cluster-995.71930|Cluster-995.67725|Cluster-995.73505|Cluster-995.76501|Cluster-995.67310|Cluster-995.70078|C…
Glycosaminoglycan degradation	ko00531	2	56	0.787947	0.999995	Cluster-995.69831|Cluster-995.69108
Glycerolipid metabolism	ko00561	8	200	0.811847	0.999995	Cluster-995.106753|Cluster-995.62769|Cluster-995.64673|Cluster-995.72892|Cluster-995.53697|Cluster-995.92330|Cluster-995.80269|Cluster-995.81284
Inositol phosphate metabolism	ko00562	5	195	0.971868	0.999995	Cluster-995.68829|Cluster-995.70493|Cluster-995.68728|Cluster-995.68650|Cluster-995.68651
Glycerophospholipid metabolism	ko00564	10	331	0.975367	0.999995	Cluster-995.64740|Cluster-995.62769|Cluster-995.52480|Cluster-995.58181|Cluster-995.67028|Cluster-995.72082|Cluster-995.70430|Cluster-995.68829|Cluster-995.63988|Cluster-995.81284
Ether lipid metabolism	ko00565	4	109	0.815383	0.999995	Cluster-995.68829|Cluster-995.64740|Cluster-995.52480|Cluster-995.67028
Arachidonic acid metabolism	ko00590	1	40	0.875012	0.999995	Cluster-995.64740
Linoleic acid metabolism	ko00591	2	38	0.594588	0.999995	Cluster-995.64740|Cluster-995.66924
alpha-Linolenic acid metabolism	ko00592	11	114	0.0454275	0.244659	Cluster-995.64740|Cluster-995.70330|Cluster-995.70996|Cluster-995.67051|Cluster-995.66352|Cluster-995.81695|Cluster-995.69415|Cluster-995.98908|Cluster-995.66643|Cluster-995.62483|Cluster-995.70566
Sphingolipid metabolism	ko00600	3	122	0.949985	0.999995	Cluster-995.72892|Cluster-995.73221|Cluster-995.82271
Glycosphingolipid biosynthesis - globo series	ko00603	2	23	0.352223	0.861404	Cluster-995.72892|Cluster-995.69108
Glycosphingolipid biosynthesis - ganglio series	ko00604	1	19	0.637203	0.999995	Cluster-995.69108
Pyruvate metabolism	ko00620	26	283	0.00592658	0.090592	Cluster-995.70689|Cluster-995.52470|Cluster-995.86014|Cluster-995.89763|Cluster-995.73228|Cluster-995.70586|Cluster-995.69909|Cluster-995.85790|Cluster-995.68938|Cluster-995.92330|Cluster-995.83528|Cluster-995.84728|Cluster-995.62497|Cluster-995.72549|Cluster-995.73230|Cluster-995.60246|Cluster-995.73797|Cluster-995.72378|Cluster-995.67313|Cluster-995.64673|Cluster-995.52884|Cluster-995.55664|Clu…
Glyoxylate and dicarboxylate metabolism	ko00630	19	195	0.00999846	0.118871	Cluster-995.35438|Cluster-995.70689|Cluster-995.67930|Cluster-995.65872|Cluster-995.81428|Cluster-995.68279|Cluster-995.69395|Cluster-995.69575|Cluster-995.63091|Cluster-995.107641|Cluster-995.73797|Cluster-995.70586|Cluster-995.70117|Cluster-995.74785|Cluster-995.62497|Cluster-995.8745|Cluster-995.67313|Cluster-995.75016|Cluster-995.68450
Propanoate metabolism	ko00640	7	87	0.182824	0.652073	Cluster-995.58274|Cluster-995.61456|Cluster-995.66261|Cluster-995.84728|Cluster-995.62497|Cluster-995.75421|Cluster-995.67313
Butanoate metabolism	ko00650	8	55	0.012045	0.128881	Cluster-995.73932|Cluster-995.65178|Cluster-995.76079|Cluster-995.44982|Cluster-995.68220|Cluster-995.67836|Cluster-995.62497|Cluster-995.69118
C5-Branched dibasic acid metabolism	ko00660	3	19	0.0921758	0.394512	Cluster-995.65178|Cluster-995.52335|Cluster-995.68220
One carbon pool by folate	ko00670	6	92	0.355552	0.861404	Cluster-995.65872|Cluster-995.63091|Cluster-995.107641|Cluster-995.70117|Cluster-995.74785|Cluster-995.52841
Carbon fixation in photosynthetic organisms	ko00710	22	270	0.0331407	0.234521	Cluster-995.70689|Cluster-995.67978|Cluster-995.89763|Cluster-995.73228|Cluster-995.73577|Cluster-995.70586|Cluster-995.65874|Cluster-995.72006|Cluster-995.68938|Cluster-995.75124|Cluster-995.67921|Cluster-995.73230|Cluster-995.70719|Cluster-995.73797|Cluster-995.72254|Cluster-995.71965|Cluster-995.8745|Cluster-995.68728|Cluster-995.52884|Cluster-995.70888|Cluster-995.66338|Cluster-995.75016
Vitamin B6 metabolism	ko00750	4	43	0.20143	0.653123	Cluster-995.43568|Cluster-995.74974|Cluster-995.66010|Cluster-995.73606
Nicotinate and nicotinamide metabolism	ko00760	1	64	0.963068	0.999995	Cluster-995.67600
Pantothenate and CoA biosynthesis	ko00770	3	96	0.872991	0.999995	Cluster-995.65178|Cluster-995.66220|Cluster-995.68220
Biotin metabolism	ko00780	4	54	0.321862	0.839982	Cluster-995.77950|Cluster-995.82175|Cluster-995.14415|Cluster-995.14416
Folate biosynthesis	ko00790	2	57	0.795833	0.999995	Cluster-995.78960|Cluster-995.49116
Porphyrin and chlorophyll metabolism	ko00860	4	175	0.979051	0.999995	Cluster-995.45452|Cluster-995.101219|Cluster-995.56840|Cluster-995.60800
Terpenoid backbone biosynthesis	ko00900	7	161	0.72956	0.999995	Cluster-995.73932|Cluster-995.57145|Cluster-995.68538|Cluster-995.101219|Cluster-995.67416|Cluster-995.62497|Cluster-995.69118
Limonene and pinene degradation	ko00903	2	46	0.693348	0.999995	Cluster-995.92330|Cluster-995.64673
Diterpenoid biosynthesis	ko00904	2	48	0.714701	0.999995	Cluster-995.23372|Cluster-9047.0
Brassinosteroid biosynthesis	ko00905	1	45	0.903035	0.999995	Cluster-995.21829
Carotenoid biosynthesis	ko00906	1	128	0.998579	0.999995	Cluster-995.69683
Sesquiterpenoid and triterpenoid biosynthesis	ko00909	2	24	0.370323	0.861404	Cluster-995.75054|Cluster-995.67971
Nitrogen metabolism	ko00910	4	84	0.637971	0.999995	Cluster-995.68450|Cluster-995.68279|Cluster-995.67930|Cluster-995.81428
Sulfur metabolism	ko00920	6	107	0.48807	0.999995	Cluster-995.74531|Cluster-995.69692|Cluster-995.69454|Cluster-995.61776|Cluster-995.69578|Cluster-995.76104
Phenylpropanoid biosynthesis	ko00940	50	394	5.15476e-08	5.51559e-06	Cluster-995.62444|Cluster-995.68104|Cluster-995.66711|Cluster-995.68617|Cluster-995.65251|Cluster-995.61203|Cluster-995.71166|Cluster-995.77321|Cluster-995.65259|Cluster-995.49493|Cluster-995.68475|Cluster-995.64799|Cluster-995.58821|Cluster-995.97474|Cluster-995.79191|Cluster-995.64383|Cluster-995.69170|Cluster-995.73716|Cluster-995.61656|Cluster-995.63324|Cluster-995.68857|Cluster-995.65281|Clu…
Flavonoid biosynthesis	ko00941	6	73	0.195334	0.653123	Cluster-995.65251|Cluster-995.61203|Cluster-995.80163|Cluster-995.65259|Cluster-995.67588|Cluster-995.79920
Flavone and flavonol biosynthesis	ko00944	4	11	0.00522201	0.090592	Cluster-995.66737|Cluster-995.67058|Cluster-995.80163|Cluster-995.79920
Stilbenoid, diarylheptanoid and gingerol biosynthesis	ko00945	4	54	0.321862	0.839982	Cluster-995.65251|Cluster-995.61203|Cluster-995.67588|Cluster-995.65259
Isoquinoline alkaloid biosynthesis	ko00950	6	47	0.0457306	0.244659	Cluster-995.72505|Cluster-995.45158|Cluster-995.76734|Cluster-995.73577|Cluster-995.62039|Cluster-995.75124
Tropane, piperidine and pyridine alkaloid biosynthesis	ko00960	7	67	0.0725868	0.344122	Cluster-995.72505|Cluster-995.45158|Cluster-995.76734|Cluster-995.73577|Cluster-995.62039|Cluster-995.75124|Cluster-995.63236
Aminoacyl-tRNA biosynthesis	ko00970	4	214	0.995123	0.999995	Cluster-995.83096|Cluster-995.90411|Cluster-995.69176|Cluster-995.74215
Biosynthesis of unsaturated fatty acids	ko01040	6	91	0.346673	0.861404	Cluster-995.67051|Cluster-995.77950|Cluster-995.14416|Cluster-995.14415|Cluster-995.70988|Cluster-995.98908
ABC transporters	ko02010	7	137	0.571977	0.999995	Cluster-995.72343|Cluster-995.83102|Cluster-995.48570|Cluster-995.65573|Cluster-995.75423|Cluster-995.98571|Cluster-995.98573
Ribosome biogenesis in eukaryotes	ko03008	7	315	0.996577	0.999995	Cluster-995.68955|Cluster-995.75488|Cluster-995.83252|Cluster-995.56231|Cluster-995.79036|Cluster-995.66169|Cluster-995.69508
Ribosome	ko03010	32	860	0.980203	0.999995	Cluster-995.68848|Cluster-995.70748|Cluster-995.77057|Cluster-995.68868|Cluster-995.70701|Cluster-995.64505|Cluster-995.67636|Cluster-995.68240|Cluster-995.71110|Cluster-995.68853|Cluster-995.69606|Cluster-995.53804|Cluster-995.79305|Cluster-995.81050|Cluster-995.94148|Cluster-995.66833|Cluster-995.71196|Cluster-995.65888|Cluster-995.65889|Cluster-995.65499|Cluster-995.63711|Cluster-995.63549|Clu…
RNA transport	ko03013	25	536	0.731814	0.999995	Cluster-995.76089|Cluster-995.65505|Cluster-995.71519|Cluster-995.68123|Cluster-995.74055|Cluster-995.71692|Cluster-995.56231|Cluster-995.75502|Cluster-995.74719|Cluster-995.68503|Cluster-995.62835|Cluster-995.96400|Cluster-995.60801|Cluster-995.77164|Cluster-995.77526|Cluster-995.67434|Cluster-995.74286|Cluster-995.66169|Cluster-995.65579|Cluster-995.65947|Cluster-995.68598|Cluster-995.66199|Clu…
mRNA surveillance pathway	ko03015	14	396	0.946622	0.999995	Cluster-995.63925|Cluster-995.65435|Cluster-995.65947|Cluster-995.43772|Cluster-995.64231|Cluster-995.65579|Cluster-995.66276|Cluster-995.67434|Cluster-995.94615|Cluster-995.54865|Cluster-995.66135|Cluster-995.107823|Cluster-995.89350|Cluster-995.76759
RNA degradation	ko03018	10	488	0.999805	0.999995	Cluster-995.62154|Cluster-995.57996|Cluster-995.88764|Cluster-995.65092|Cluster-995.69082|Cluster-995.67434|Cluster-995.91636|Cluster-995.69241|Cluster-995.74634|Cluster-995.44585
RNA polymerase	ko03020	3	108	0.916604	0.999995	Cluster-995.55924|Cluster-995.73182|Cluster-995.49527
Basal transcription factors	ko03022	1	149	0.999513	0.999995	Cluster-995.72811
DNA replication	ko03030	11	198	0.458965	0.999995	Cluster-995.86037|Cluster-995.108684|Cluster-995.26135|Cluster-995.26521|Cluster-995.105975|Cluster-995.46107|Cluster-995.49556|Cluster-995.105939|Cluster-995.71137|Cluster-995.107766|Cluster-995.105981
Spliceosome	ko03040	24	608	0.929548	0.999995	Cluster-995.71162|Cluster-995.55622|Cluster-995.92231|Cluster-995.66306|Cluster-995.71097|Cluster-995.82021|Cluster-995.86122|Cluster-995.51402|Cluster-995.80105|Cluster-995.68294|Cluster-995.63653|Cluster-995.67684|Cluster-995.78913|Cluster-995.68835|Cluster-995.65579|Cluster-995.66381|Cluster-995.60187|Cluster-995.50820|Cluster-995.65947|Cluster-995.94615|Cluster-995.76759|Cluster-995.69382|Clu…
Proteasome	ko03050	15	178	0.0559441	0.285048	Cluster-995.85284|Cluster-995.52617|Cluster-995.45809|Cluster-995.77740|Cluster-995.61187|Cluster-995.81685|Cluster-995.83498|Cluster-995.60261|Cluster-995.62355|Cluster-995.71198|Cluster-995.65095|Cluster-995.50269|Cluster-995.74319|Cluster-995.58383|Cluster-995.67959
Base excision repair	ko03410	5	164	0.924697	0.999995	Cluster-995.22079|Cluster-995.67646|Cluster-995.26521|Cluster-995.26135|Cluster-995.67645
Nucleotide excision repair	ko03420	6	276	0.995239	0.999995	Cluster-995.86037|Cluster-995.26135|Cluster-995.72990|Cluster-995.26521|Cluster-995.105939|Cluster-995.71137
Mismatch repair	ko03430	5	164	0.924697	0.999995	Cluster-995.86037|Cluster-995.71137|Cluster-995.26521|Cluster-995.26135|Cluster-995.105939
Homologous recombination	ko03440	1	237	0.999995	0.999995	Cluster-995.105939
Plant hormone signal transduction	ko04075	31	668	0.759283	0.999995	Cluster-995.62625|Cluster-995.49358|Cluster-995.70422|Cluster-995.66974|Cluster-995.67403|Cluster-995.66815|Cluster-995.67344|Cluster-995.63697|Cluster-995.66645|Cluster-995.56642|Cluster-995.81058|Cluster-995.72629|Cluster-995.95114|Cluster-995.68896|Cluster-995.46392|Cluster-995.68779|Cluster-995.68398|Cluster-995.70796|Cluster-995.77250|Cluster-995.73055|Cluster-995.117198|Cluster-995.65099|Cl…
Ubiquitin mediated proteolysis	ko04120	30	479	0.182328	0.652073	Cluster-995.71692|Cluster-995.71591|Cluster-995.68990|Cluster-995.66052|Cluster-995.105427|Cluster-995.59933|Cluster-995.71519|Cluster-995.79668|Cluster-995.67222|Cluster-995.58359|Cluster-995.66296|Cluster-995.67302|Cluster-995.66342|Cluster-995.69212|Cluster-995.87913|Cluster-995.23965|Cluster-995.51402|Cluster-995.80105|Cluster-995.68294|Cluster-995.67922|Cluster-995.64208|Cluster-995.71586|Cl…
SNARE interactions in vesicular transport	ko04130	6	135	0.702286	0.999995	Cluster-995.91264|Cluster-995.25850|Cluster-995.65724|Cluster-995.61098|Cluster-995.66653|Cluster-995.82671
Regulation of autophagy	ko04140	3	152	0.984227	0.999995	Cluster-995.74141|Cluster-995.75490|Cluster-995.65757
Protein processing in endoplasmic reticulum	ko04141	33	620	0.472512	0.999995	Cluster-995.71591|Cluster-995.66052|Cluster-995.40465|Cluster-995.66837|Cluster-995.66296|Cluster-995.67302|Cluster-995.66574|Cluster-995.75932|Cluster-995.70734|Cluster-995.69212|Cluster-995.66306|Cluster-995.87913|Cluster-995.77931|Cluster-995.71510|Cluster-995.70147|Cluster-995.68990|Cluster-995.67922|Cluster-995.72990|Cluster-995.67966|Cluster-995.67684|Cluster-995.67418|Cluster-995.71131|Clu…
Endocytosis	ko04144	23	518	0.800193	0.999995	Cluster-995.52480|Cluster-995.71494|Cluster-995.88333|Cluster-995.71905|Cluster-995.72965|Cluster-995.111918|Cluster-995.79056|Cluster-995.50932|Cluster-995.66306|Cluster-995.82028|Cluster-995.67173|Cluster-995.57193|Cluster-995.67684|Cluster-995.109787|Cluster-995.99497|Cluster-995.66381|Cluster-995.67753|Cluster-995.44362|Cluster-995.70505|Cluster-995.69839|Cluster-995.67028|Cluster-995.66887|C…
Phagosome	ko04145	18	294	0.282629	0.775419	Cluster-995.64213|Cluster-995.66653|Cluster-995.57193|Cluster-995.65045|Cluster-995.74576|Cluster-995.49222|Cluster-995.79618|Cluster-995.67394|Cluster-995.70642|Cluster-995.68788|Cluster-995.70413|Cluster-995.77259|Cluster-995.66818|Cluster-995.67088|Cluster-995.56047|Cluster-995.81619|Cluster-995.26443|Cluster-995.72213
Peroxisome	ko04146	8	245	0.936091	0.999995	Cluster-995.64456|Cluster-995.62635|Cluster-995.67051|Cluster-995.82717|Cluster-995.69575|Cluster-995.98908|Cluster-995.110280|Cluster-995.75235
Plant-pathogen interaction	ko04626	15	619	0.999712	0.999995	Cluster-995.40734|Cluster-995.65353|Cluster-995.60967|Cluster-995.65797|Cluster-995.74249|Cluster-995.61880|Cluster-995.68708|Cluster-995.65450|Cluster-995.76011|Cluster-995.63436|Cluster-995.40465|Cluster-995.67391|Cluster-995.62548|Cluster-995.66837|Cluster-995.66278
Circadian rhythm - plant	ko04712	5	131	0.807767	0.999995	Cluster-995.87228|Cluster-995.92735|Cluster-995.87246|Cluster-995.69940|Cluster-995.53524

## Sheet: BC30vsSC30
#Term	KO ID	Input number	Background number	P-Value	Corrected P-Value	Input
Glycolysis / Gluconeogenesis	ko00010	11	457	0.530446	0.998799	Cluster-995.58816|Cluster-995.70719|Cluster-995.73694|Cluster-995.76550|Cluster-995.69868|Cluster-995.92330|Cluster-995.74634|Cluster-995.69082|Cluster-995.66338|Cluster-995.48487|Cluster-995.87654
Citrate cycle (TCA cycle)	ko00020	6	176	0.251114	0.762001	Cluster-995.67897|Cluster-995.71478|Cluster-995.55699|Cluster-995.70586|Cluster-995.78592|Cluster-995.79750
Pentose phosphate pathway	ko00030	6	215	0.410174	0.998799	Cluster-995.72513|Cluster-995.73694|Cluster-995.70888|Cluster-995.74634|Cluster-995.76550|Cluster-995.72254
Pentose and glucuronate interconversions	ko00040	2	140	0.846436	0.998799	Cluster-995.92330|Cluster-995.63618
Fructose and mannose metabolism	ko00051	5	203	0.534244	0.998799	Cluster-995.73694|Cluster-995.74634|Cluster-995.76550|Cluster-995.63618|Cluster-995.70646
Galactose metabolism	ko00052	8	184	0.0809112	0.508584	Cluster-995.69707|Cluster-995.86282|Cluster-995.67883|Cluster-995.74634|Cluster-995.60916|Cluster-995.66260|Cluster-995.48487|Cluster-995.65151
Ascorbate and aldarate metabolism	ko00053	2	132	0.82249	0.998799	Cluster-995.92330|Cluster-995.68944
Fatty acid biosynthesis	ko00061	3	112	0.503416	0.998799	Cluster-995.81802|Cluster-995.77950|Cluster-995.63884
Fatty acid elongation	ko00062	3	63	0.198903	0.688797	Cluster-995.70040|Cluster-995.119527|Cluster-995.82431
Fatty acid degradation	ko00071	2	127	0.805872	0.998799	Cluster-995.92330|Cluster-995.73848
Cutin, suberine and wax biosynthesis	ko00073	1	55	0.733208	0.998799	Cluster-995.90995
Steroid biosynthesis	ko00100	6	66	0.00661502	0.0727652	Cluster-995.73884|Cluster-995.63461|Cluster-995.72125|Cluster-995.77350|Cluster-995.57249|Cluster-995.70118
Ubiquinone and other terpenoid-quinone biosynthesis	ko00130	5	114	0.145103	0.592523	Cluster-995.65522|Cluster-995.79602|Cluster-995.77380|Cluster-995.70779|Cluster-995.68327
Oxidative phosphorylation	ko00190	25	430	7.32837e-05	0.00128979	Cluster-995.87676|Cluster-995.64215|Cluster-995.65545|Cluster-995.65540|Cluster-995.62700|Cluster-995.62414|Cluster-995.68941|Cluster-995.67447|Cluster-995.60893|Cluster-995.68348|Cluster-995.65654|Cluster-995.64164|Cluster-995.50394|Cluster-995.68656|Cluster-995.69254|Cluster-995.70143|Cluster-995.54967|Cluster-995.74576|Cluster-995.66960|Cluster-995.75929|Cluster-995.64009|Cluster-995.73132|Clu…
Arginine biosynthesis	ko00220	5	110	0.131017	0.592523	Cluster-995.68450|Cluster-995.55583|Cluster-995.67501|Cluster-995.76213|Cluster-995.67930
Purine metabolism	ko00230	5	556	0.996977	0.998799	Cluster-995.78118|Cluster-995.75435|Cluster-995.67306|Cluster-995.73752|Cluster-995.69868
Pyrimidine metabolism	ko00240	4	408	0.987489	0.998799	Cluster-995.75435|Cluster-995.48168|Cluster-995.67306|Cluster-995.82388
Alanine, aspartate and glutamate metabolism	ko00250	4	171	0.584396	0.998799	Cluster-995.68450|Cluster-995.67501|Cluster-995.76213|Cluster-995.67930
Glycine, serine and threonine metabolism	ko00260	9	224	0.0958389	0.562255	Cluster-995.72863|Cluster-995.73606|Cluster-995.72505|Cluster-995.59004|Cluster-995.76734|Cluster-995.63091|Cluster-995.98878|Cluster-995.70117|Cluster-995.74785
Cysteine and methionine metabolism	ko00270	11	310	0.131498	0.592523	Cluster-995.38426|Cluster-995.62147|Cluster-995.71478|Cluster-995.67120|Cluster-995.55699|Cluster-995.74158|Cluster-995.69222|Cluster-995.70586|Cluster-995.70170|Cluster-995.71219|Cluster-995.80182
Valine, leucine and isoleucine degradation	ko00280	2	135	0.831839	0.998799	Cluster-995.92330|Cluster-995.73848
Lysine degradation	ko00310	2	133	0.825657	0.998799	Cluster-995.92330|Cluster-995.79750
Arginine and proline metabolism	ko00330	6	168	0.220658	0.693497	Cluster-995.55583|Cluster-995.72868|Cluster-995.92330|Cluster-995.69222|Cluster-995.75525|Cluster-995.71219
Histidine metabolism	ko00340	2	55	0.384361	0.994818	Cluster-995.92330|Cluster-995.61651
Tyrosine metabolism	ko00350	4	93	0.19024	0.688797	Cluster-995.64431|Cluster-995.72505|Cluster-995.98878|Cluster-995.76734
Phenylalanine metabolism	ko00360	10	127	0.00140988	0.0206783	Cluster-995.79602|Cluster-995.68104|Cluster-995.72505|Cluster-995.65522|Cluster-995.68617|Cluster-995.76734|Cluster-995.64431|Cluster-995.98878|Cluster-995.77380|Cluster-995.71288
Tryptophan metabolism	ko00380	5	93	0.0788926	0.508584	Cluster-995.92330|Cluster-995.61761|Cluster-995.69575|Cluster-995.64140|Cluster-995.79750
Phenylalanine, tyrosine and tryptophan biosynthesis	ko00400	2	139	0.843612	0.998799	Cluster-995.64431|Cluster-995.59004
beta-Alanine metabolism	ko00410	5	131	0.211335	0.688797	Cluster-995.92330|Cluster-995.48168|Cluster-995.72505|Cluster-995.98878|Cluster-995.76734
Cyanoamino acid metabolism	ko00460	10	136	0.00226278	0.0284464	Cluster-995.68279|Cluster-995.83984|Cluster-995.65627|Cluster-995.68476|Cluster-995.63091|Cluster-22434.0|Cluster-995.70117|Cluster-995.74785|Cluster-995.82673|Cluster-995.67533
Glutathione metabolism	ko00480	6	250	0.550922	0.998799	Cluster-995.62740|Cluster-995.65517|Cluster-995.68335|Cluster-995.67655|Cluster-995.63392|Cluster-995.68944
Starch and sucrose metabolism	ko00500	11	536	0.731362	0.998799	Cluster-995.68116|Cluster-995.65151|Cluster-995.83984|Cluster-995.68657|Cluster-995.65627|Cluster-995.68476|Cluster-22434.0|Cluster-995.86282|Cluster-995.68229|Cluster-995.82673|Cluster-995.67533
N-Glycan biosynthesis	ko00510	2	149	0.869842	0.998799	Cluster-995.70187|Cluster-995.67850
Amino sugar and nucleotide sugar metabolism	ko00520	4	360	0.971701	0.998799	Cluster-995.63763|Cluster-995.68229|Cluster-995.67495|Cluster-995.53958
Glycosaminoglycan degradation	ko00531	1	56	0.739437	0.998799	Cluster-995.69831
Glycerolipid metabolism	ko00561	5	200	0.521352	0.998799	Cluster-995.92330|Cluster-995.62769|Cluster-995.45361|Cluster-995.67883|Cluster-995.66260
Inositol phosphate metabolism	ko00562	3	195	0.843039	0.998799	Cluster-995.95011|Cluster-995.68650|Cluster-995.68651
Glycosylphosphatidylinositol(GPI)-anchor biosynthesis	ko00563	1	109	0.925629	0.998799	Cluster-995.67850
Glycerophospholipid metabolism	ko00564	5	331	0.894542	0.998799	Cluster-995.72475|Cluster-995.65530|Cluster-995.45361|Cluster-995.63355|Cluster-995.62769
Ether lipid metabolism	ko00565	1	109	0.925629	0.998799	Cluster-995.72475
Arachidonic acid metabolism	ko00590	1	40	0.619788	0.998799	Cluster-995.62740
alpha-Linolenic acid metabolism	ko00592	5	114	0.145103	0.592523	Cluster-995.74586|Cluster-995.63496|Cluster-995.66643|Cluster-995.74291|Cluster-995.73848
Sphingolipid metabolism	ko00600	2	122	0.787884	0.998799	Cluster-995.67883|Cluster-995.66260
Glycosphingolipid biosynthesis - globo series	ko00603	2	23	0.114359	0.592523	Cluster-995.67883|Cluster-995.66260
Pyruvate metabolism	ko00620	10	283	0.148131	0.592523	Cluster-995.69732|Cluster-995.92330|Cluster-995.71478|Cluster-995.55699|Cluster-995.69868|Cluster-995.69909|Cluster-995.70586|Cluster-995.87654|Cluster-995.90396|Cluster-995.78592
Glyoxylate and dicarboxylate metabolism	ko00630	16	195	3.7702e-05	0.000829443	Cluster-995.72863|Cluster-995.67897|Cluster-995.71478|Cluster-995.68279|Cluster-995.67501|Cluster-995.55699|Cluster-995.67930|Cluster-995.63091|Cluster-995.76213|Cluster-995.61761|Cluster-995.70586|Cluster-995.70117|Cluster-995.74785|Cluster-995.81428|Cluster-995.68450|Cluster-995.69575
Propanoate metabolism	ko00640	1	87	0.874804	0.998799	Cluster-995.87654
One carbon pool by folate	ko00670	3	92	0.381383	0.994818	Cluster-995.74785|Cluster-995.63091|Cluster-995.70117
Carbon fixation in photosynthetic organisms	ko00710	10	270	0.12045	0.592523	Cluster-995.69732|Cluster-995.71478|Cluster-995.70719|Cluster-995.73694|Cluster-995.55699|Cluster-995.70888|Cluster-995.66338|Cluster-995.70586|Cluster-995.90396|Cluster-995.72254
Thiamine metabolism	ko00730	1	48	0.685236	0.998799	Cluster-995.66494
Vitamin B6 metabolism	ko00750	1	43	0.645787	0.998799	Cluster-995.73606
Pantothenate and CoA biosynthesis	ko00770	1	96	0.898822	0.998799	Cluster-995.48168
Biotin metabolism	ko00780	2	54	0.376039	0.994818	Cluster-995.77950|Cluster-995.63884
Porphyrin and chlorophyll metabolism	ko00860	1	175	0.984461	0.998799	Cluster-995.56841
Terpenoid backbone biosynthesis	ko00900	2	161	0.89596	0.998799	Cluster-995.73293|Cluster-995.68850
Limonene and pinene degradation	ko00903	2	46	0.308031	0.893575	Cluster-995.92330|Cluster-995.4743
Carotenoid biosynthesis	ko00906	3	128	0.591516	0.998799	Cluster-995.47626|Cluster-995.90026|Cluster-995.69683
Nitrogen metabolism	ko00910	6	84	0.0186388	0.182246	Cluster-995.68279|Cluster-995.67930|Cluster-995.81428|Cluster-995.67501|Cluster-995.68450|Cluster-995.76213
Sulfur metabolism	ko00920	1	107	0.922022	0.998799	Cluster-995.62147
Phenylpropanoid biosynthesis	ko00940	40	394	1.39366e-13	1.22642e-11	Cluster-995.68104|Cluster-995.77380|Cluster-995.65522|Cluster-995.40528|Cluster-995.87440|Cluster-995.88457|Cluster-995.69008|Cluster-995.77321|Cluster-995.71288|Cluster-995.79191|Cluster-995.64383|Cluster-995.83984|Cluster-995.68476|Cluster-995.68617|Cluster-22434.0|Cluster-995.65281|Cluster-995.66321|Cluster-995.82673|Cluster-995.44085|Cluster-995.51828|Cluster-995.62444|Cluster-995.35994|Clust…
Flavonoid biosynthesis	ko00941	10	73	2.27798e-05	0.000695619	Cluster-995.60186|Cluster-995.98962|Cluster-995.60185|Cluster-995.97606|Cluster-995.75152|Cluster-995.38333|Cluster-995.96420|Cluster-995.80163|Cluster-995.97432|Cluster-995.79920
Flavone and flavonol biosynthesis	ko00944	5	11	2.37143e-05	0.000695619	Cluster-995.96420|Cluster-995.60186|Cluster-995.60185|Cluster-995.80163|Cluster-995.79920
Stilbenoid, diarylheptanoid and gingerol biosynthesis	ko00945	1	54	0.72683	0.998799	Cluster-995.4743
Isoquinoline alkaloid biosynthesis	ko00950	4	47	0.0307196	0.225277	Cluster-995.64431|Cluster-995.72505|Cluster-995.98878|Cluster-995.76734
Tropane, piperidine and pyridine alkaloid biosynthesis	ko00960	5	67	0.0262537	0.225277	Cluster-995.64431|Cluster-995.72505|Cluster-995.75530|Cluster-995.76734|Cluster-995.98878
Aminoacyl-tRNA biosynthesis	ko00970	2	214	0.962769	0.998799	Cluster-995.69176|Cluster-995.63920
Biosynthesis of unsaturated fatty acids	ko01040	4	91	0.180878	0.688797	Cluster-995.81802|Cluster-995.77950|Cluster-995.73848|Cluster-995.82431
ABC transporters	ko02010	4	137	0.416973	0.998799	Cluster-995.55938|Cluster-995.95743|Cluster-995.65351|Cluster-995.84201
Ribosome biogenesis in eukaryotes	ko03008	6	315	0.76114	0.998799	Cluster-995.83251|Cluster-995.75488|Cluster-995.83252|Cluster-995.79036|Cluster-995.66169|Cluster-995.69508
Ribosome	ko03010	15	860	0.915984	0.998799	Cluster-995.70918|Cluster-995.64203|Cluster-995.64505|Cluster-995.62694|Cluster-995.63299|Cluster-995.69645|Cluster-995.66786|Cluster-995.67636|Cluster-995.71196|Cluster-995.84853|Cluster-995.83382|Cluster-995.66621|Cluster-995.63517|Cluster-995.66750|Cluster-995.69072
RNA transport	ko03013	8	536	0.940385	0.998799	Cluster-995.66997|Cluster-995.66199|Cluster-995.68231|Cluster-995.64982|Cluster-995.69639|Cluster-995.66169|Cluster-995.77287|Cluster-995.61447
mRNA surveillance pathway	ko03015	5	396	0.958528	0.998799	Cluster-995.66276|Cluster-995.69880|Cluster-995.77287|Cluster-995.66997|Cluster-995.68231
RNA degradation	ko03018	8	488	0.894501	0.998799	Cluster-995.66997|Cluster-995.58816|Cluster-995.57996|Cluster-995.69082|Cluster-995.74634|Cluster-995.67350|Cluster-995.59708|Cluster-995.68231
Basal transcription factors	ko03022	1	149	0.97119	0.998799	Cluster-995.72811
Spliceosome	ko03040	5	608	0.998799	0.998799	Cluster-995.64232|Cluster-995.65383|Cluster-995.77287|Cluster-995.65157|Cluster-995.66381
Proteasome	ko03050	5	178	0.422953	0.998799	Cluster-995.62355|Cluster-995.83498|Cluster-995.58383|Cluster-995.77749|Cluster-995.88198
Base excision repair	ko03410	3	164	0.749773	0.998799	Cluster-995.96292|Cluster-995.67646|Cluster-995.96814
Non-homologous end-joining	ko03450	1	46	0.670012	0.998799	Cluster-995.35315
Plant hormone signal transduction	ko04075	14	668	0.722535	0.998799	Cluster-995.38540|Cluster-995.80235|Cluster-995.42212|Cluster-995.49359|Cluster-995.75641|Cluster-995.70954|Cluster-995.82221|Cluster-995.88965|Cluster-995.69634|Cluster-995.67620|Cluster-995.61242|Cluster-995.65099|Cluster-995.66421|Cluster-995.66288
Cell cycle - Caulobacter	ko04112	1	80	0.852256	0.998799	Cluster-995.75625
Ubiquitin mediated proteolysis	ko04120	6	479	0.971284	0.998799	Cluster-995.66469|Cluster-995.67922|Cluster-995.71591|Cluster-995.69212|Cluster-995.87913|Cluster-995.71916
Regulation of autophagy	ko04140	1	152	0.97317	0.998799	Cluster-995.53690
Protein processing in endoplasmic reticulum	ko04141	15	620	0.514665	0.998799	Cluster-995.66469|Cluster-995.67922|Cluster-995.67872|Cluster-995.71591|Cluster-995.67828|Cluster-995.65907|Cluster-995.69212|Cluster-995.65383|Cluster-995.39633|Cluster-995.70147|Cluster-995.87913|Cluster-995.72349|Cluster-995.71131|Cluster-995.71916|Cluster-995.66381
Endocytosis	ko04144	13	518	0.466807	0.998799	Cluster-995.63899|Cluster-995.69686|Cluster-995.68502|Cluster-995.83495|Cluster-995.72475|Cluster-995.68341|Cluster-995.65383|Cluster-995.70505|Cluster-995.71711|Cluster-995.77319|Cluster-995.75331|Cluster-995.67232|Cluster-995.66381
Phagosome	ko04145	13	294	0.0285177	0.225277	Cluster-995.68941|Cluster-995.64213|Cluster-995.77259|Cluster-995.67872|Cluster-995.74576|Cluster-995.67394|Cluster-995.77319|Cluster-995.75929|Cluster-995.24536|Cluster-995.56047|Cluster-995.67828|Cluster-995.67080|Cluster-995.87676
Peroxisome	ko04146	3	245	0.930621	0.998799	Cluster-995.61761|Cluster-995.69575|Cluster-995.73848
Plant-pathogen interaction	ko04626	17	619	0.314782	0.893575	Cluster-995.78456|Cluster-995.68668|Cluster-995.65123|Cluster-995.70609|Cluster-995.67391|Cluster-995.79484|Cluster-995.65976|Cluster-995.74249|Cluster-995.102110|Cluster-995.66701|Cluster-995.76011|Cluster-995.71282|Cluster-995.55583|Cluster-995.77654|Cluster-995.40734|Cluster-995.66606|Cluster-995.75249
Circadian rhythm - plant	ko04712	5	131	0.211335	0.688797	Cluster-995.38333|Cluster-995.87246|Cluster-995.69940|Cluster-995.97606|Cluster-995.106138
